# Supplementary material for: Pan-cancer analysis of disulfidptosis with potential implications in prognosis, immune microenvironment, and drug resistance in human cancer
Source: publisher site journal article supplement (doi:10.18632/aging.205993), 2024-07-03
Supplement: Supplementary file [file aging-v16-205993-supplementary-material-SD1.pdf]

**SUPPLEMENTARY FIGURES**

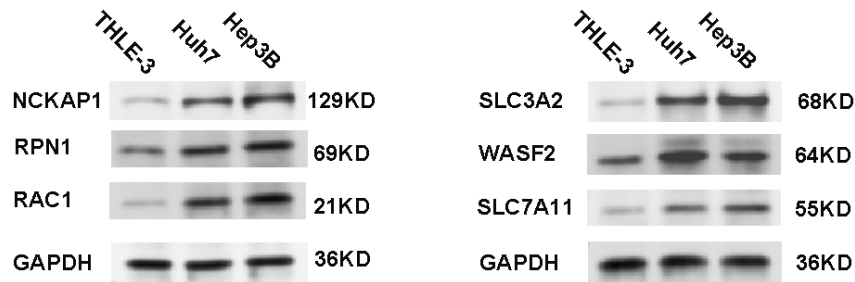

Supplementary Figure 1. Disulfidptosis genes' protein expression was detected in hepatocellular carcinoma cells and normal liver epithelial cells via Western-blotting analysis.

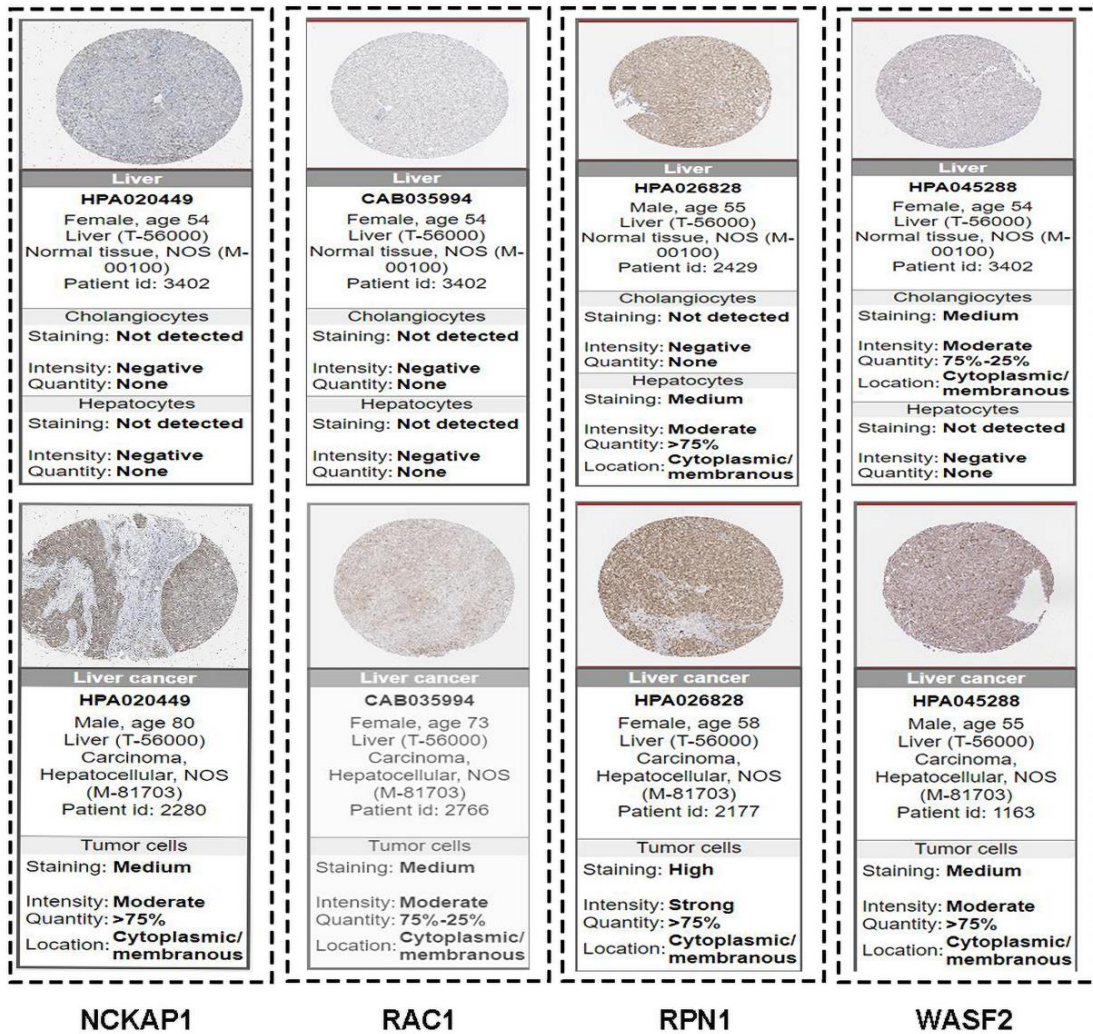

Supplementary Figure 2. Patient information and the detailed staining of immune-histochemistry pictures from the HPA database.

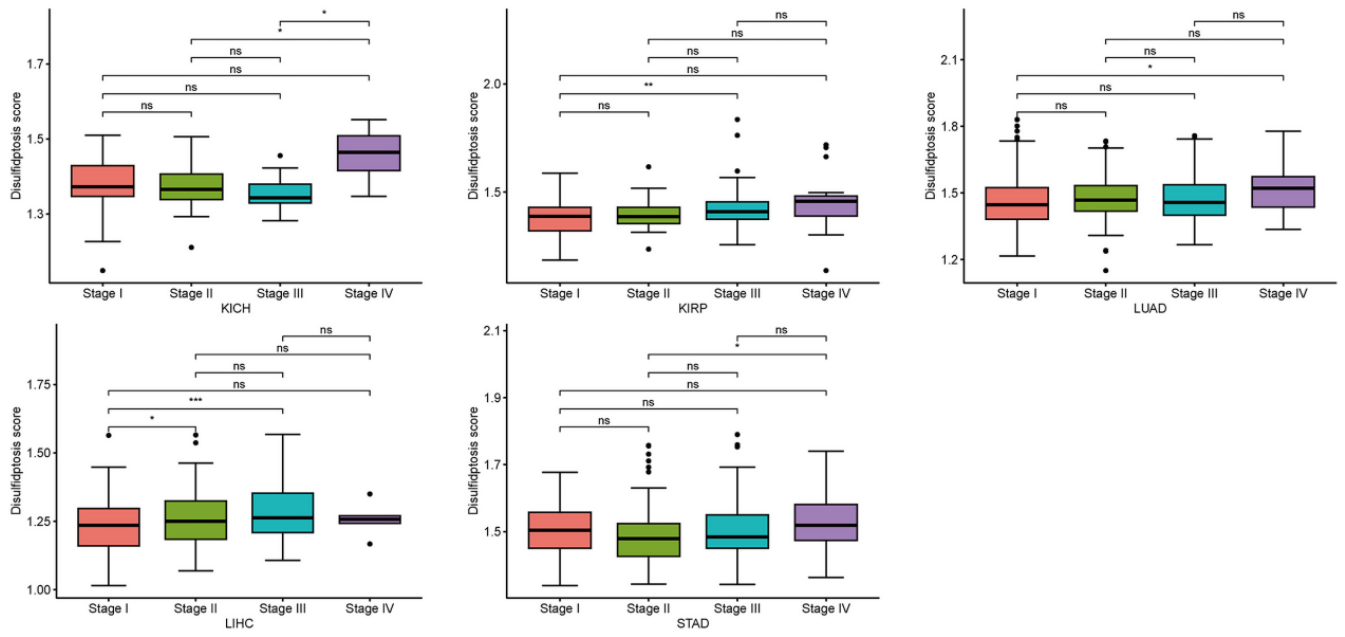

**Supplementary Figure 3. Differences in the disulfidptosis score in different stages of different tumors.** \*p < 0.05, \*\* p < 0.01, and \*\*\* p < 0.001, ns, No statistical significant.
