# Supplementary material for: Pan-cancer analysis of disulfidptosis with potential implications in prognosis, immune microenvironment, and drug resistance in human cancer
Source: publisher site journal article supplement (doi:10.18632/aging.205993), 2024-07-03
Supplement: Supplementary file [file aging-v16-205993-supplementary-material-SD2.pdf]

## SUPPLEMENTARY TABLES

**Supplementary Table 1. List of cancer types analyzed in this study.**

| <b>TCGA code</b> | <b>Cancer type</b>                                               | <b>Histology</b> |
|------------------|------------------------------------------------------------------|------------------|
| ACC              | Adrenocortical carcinoma                                         | Carcinoma        |
| BLCA             | Bladder urothelial carcinoma                                     | Carcinoma        |
| BRCA             | Breast invasive carcinoma                                        | Carcinoma        |
| CESC             | Cervical squamous cell carcinoma and endocervical adenocarcinoma | Carcinoma        |
| CHOL             | Cholangiocarcinoma (bile duct)                                   | Carcinoma        |
| COAD             | Colon adenocarcinoma                                             | Carcinoma        |
| DLBC             | Lymphoid neoplasm diffuse large B-cell lymphoma                  | Lymphoma         |
| ESCA             | Esophageal carcinoma                                             | Carcinoma        |
| GBM              | Glioblastoma multiforme                                          | Sarcoma          |
| HNSC             | Head and neck squamous cell carcinoma                            | Carcinoma        |
| KICH             | Kidney chromophobe                                               | Carcinoma        |
| KIRC             | Kidney renal clear cell carcinoma                                | Carcinoma        |
| KIRP             | Kidney renal papillary cell carcinoma                            | Carcinoma        |
| LAML             | Acute myeloid leukemia                                           | Leukemia         |
| LGG              | Brain lower grade glioma                                         | Sarcoma          |
| LIHC             | Liver hepatocellular carcinoma                                   | Carcinoma        |
| LUAD             | Lung adenocarcinoma                                              | Carcinoma        |
| LUSC             | Lung squamous cell carcinoma                                     | Carcinoma        |
| OV               | Ovarian serous cystadenocarcinoma                                | Carcinoma        |
| PAAD             | Pancreatic adenocarcinoma                                        | Carcinoma        |
| PCPG             | Pheochromocytoma and paraganglioma (adrenal gland)               |                  |
| PRAD             | Prostate adenocarcinoma                                          | Carcinoma        |
| READ             | Rectum adenocarcinoma                                            | Carcinoma        |
| SARC             | Sarcoma                                                          | Sarcoma          |
| SKCM             | Skin cutaneous melanoma                                          |                  |
| STAD             | Stomach adenocarcinoma                                           | Carcinoma        |
| TGCT             | Testicular germ cell tumors                                      | Carcinoma        |
| THCA             | Thyroid carcinoma                                                | Carcinoma        |
| THYM             | Thymoma                                                          | Lymphoma         |
| UCEC             | Uterine corpus endometrial carcinoma                             | Carcinoma        |
| UCS              | Uterine carcinosarcoma                                           | Mixed type       |
| UVM              | Uveal melanoma                                                   | Carcinoma        |

**Supplementary Table 2. The primer sequences used in this study.**

| <b>Gene</b> | <b>Primer sequence (5' -&gt; 3')</b> |                         |
|-------------|--------------------------------------|-------------------------|
| NCKAP1      | Forward Primer                       | TTGTACCCCATAGCAAGTCTCT  |
|             | Reverse Primer                       | GGGCATTTCTCCACTGGTCAG   |
| RAC1        | Forward Primer                       | ATGTCCGTGCAAAGTGGTATC   |
|             | Reverse Primer                       | CTCGGATCGCTTCGTCAAACA   |
| RPN1        | Forward Primer                       | GGCCAAGATTCAGTCATTGTGG  |
|             | Reverse Primer                       | CTTCGTTGGATAGGGAGAGTAGA |
| SLC3A2      | Forward Primer                       | TGAATGAGTTAGAGCCCGAGA   |
|             | Reverse Primer                       | GTCTCCGCCACCTTGATCTT    |
| SLC7A11     | Forward Primer                       | TCTCAAAGGAGGTTACCTGC    |
|             | Reverse Primer                       | AGACTCCCCTCAGTAAAGTGAC  |
| WASF2       | Forward Primer                       | TAGTAACGAGGAACATCGAGCC  |
|             | Reverse Primer                       | AAGGGAGCTTACCCGAGAGG    |
